# Supplementary material
Source: PubMed Central journal article supplement (PMC2729334)
Supplement: supp_136_15_2545__10.pdf [file supp_136_15_2545__10.pdf]

**Table S1. Bioinformatics prediction of Nkx6-1 target genes**

| Gene symbol   | Promoter ID | Transcript ID | <i>Nkx6-1</i> BS in mouse promoter |                 | Promoter sequences with <i>Nkx6-1</i> BS |                            |              | <i>Nkx6-1</i> <sup>-/-</sup> phenotype | Nkx6-1 activity on promoter <sup>§</sup> |
|---------------|-------------|---------------|------------------------------------|-----------------|------------------------------------------|----------------------------|--------------|----------------------------------------|------------------------------------------|
|               |             |               | Number                             | Position*       | Sequences                                | Ortholog <sup>†</sup>      | Conserved BS |                                        |                                          |
| <i>Otx2</i>   | GXP_236948  | NM_144841     | 6                                  | -518 to -175 bp | 7                                        | Hs, Mm, Rn, Cl, Bt, Ec, Pt | 4            | Ectopic induction                      | Repression                               |
| <i>Dbx1</i>   | GXP_206557  | NM_001005232  | 1                                  | -329 bp         | 7                                        | Hs, Mm, Rn, Cl, Bt, Ec, Pt | 1            | Ectopic induction                      | Repression                               |
| <i>Helt</i>   | GXP_157998  | NM_173789     | 4                                  | -379 to +24 bp  | 5                                        | Hs, Mm, Rn, Ec, Pt         | 4            | Not changed                            | ?                                        |
| <i>Gad1</i>   | GXP_815397  | NM_008077     | 1                                  | -765 bp         | 5                                        | Mm, Rn, Cl, Bt, Ec         | 1            | Not changed                            | ?                                        |
| <i>Nrp2</i>   | GXP_1241740 | ‡             | 1                                  | No TSS defined  | 5                                        | Hs, Mm, Rn, Cl, Pt         | 1            | Not changed                            | ?                                        |
| <i>Slit2</i>  | GXP_1246669 | XM_001513206  | 2                                  | -121 to -37 bp  | 4                                        | Hs, Mm, Rn, Pt             | 1            | Lost expression                        | Activation                               |
| <i>Unc5c</i>  | GXP_430782  | AK138987      | 1                                  | -420 bp         | 4                                        | Hs, Mm, Bt, Pt             | -            | Ectopic induction                      | Repression                               |
| <i>Robo1</i>  | GXP_1239247 | ‡             | 1                                  | No TSS defined  | 4                                        | Hs, Mm, Cl, Pt             | 1            | Ectopic induction                      | Repression                               |
| <i>Nkx6-2</i> | GXP_70860   | NM_183248     | 1                                  | -267 bp         | 3                                        | Mm, Rn, Pt                 | 1            | Ectopic induction                      | Indirect repression <sup>¶</sup>         |
| <i>Pax7</i>   | GXP_105702  | NM_011039     | 1                                  | -926 bp         | 2                                        | Mm, Rn                     | 1            | Ectopic induction                      | Repression                               |
| <i>Pou4f1</i> | GXP_1238014 | XM_001473425  | 7                                  | -476 to -335 bp | 2                                        | Hs, Mm                     | 1            | Lost expression                        | Activation                               |

The genes in the first column were ranked by the degree of conservation of predicted Nkx6-1 BSs across seven mammalian species. The higher the amount of conserved sites in an increasing number of orthologous promoter sequences, the higher the rank of the corresponding gene listed from top to bottom in the table.

\*Position relative to transcription start site (TSS).

<sup>†</sup>Hs, *Homo sapiens* (human); Mm, *Mus musculus* (mouse); Rn, *Rattus norvegicus* (rat); Cl, *Canis lupus* (dog); Bt, *Bos taurus* (cow); Ec, *Equus caballus* (horse); Pt, *Pan troglodytes* (chimpanzee).

<sup>‡</sup>No transcript assigned, predicted promoter from orthologs.

<sup>§</sup>Presumed activity based on *Nkx6-1*<sup>-/-</sup> midbrain phenotype.

<sup>¶</sup>Nkx6-1 and Nkx6-2 are not coexpressed at the relevant stages.
