# Supplementary material
Source: PubMed Central journal article supplement (PMC2729334)

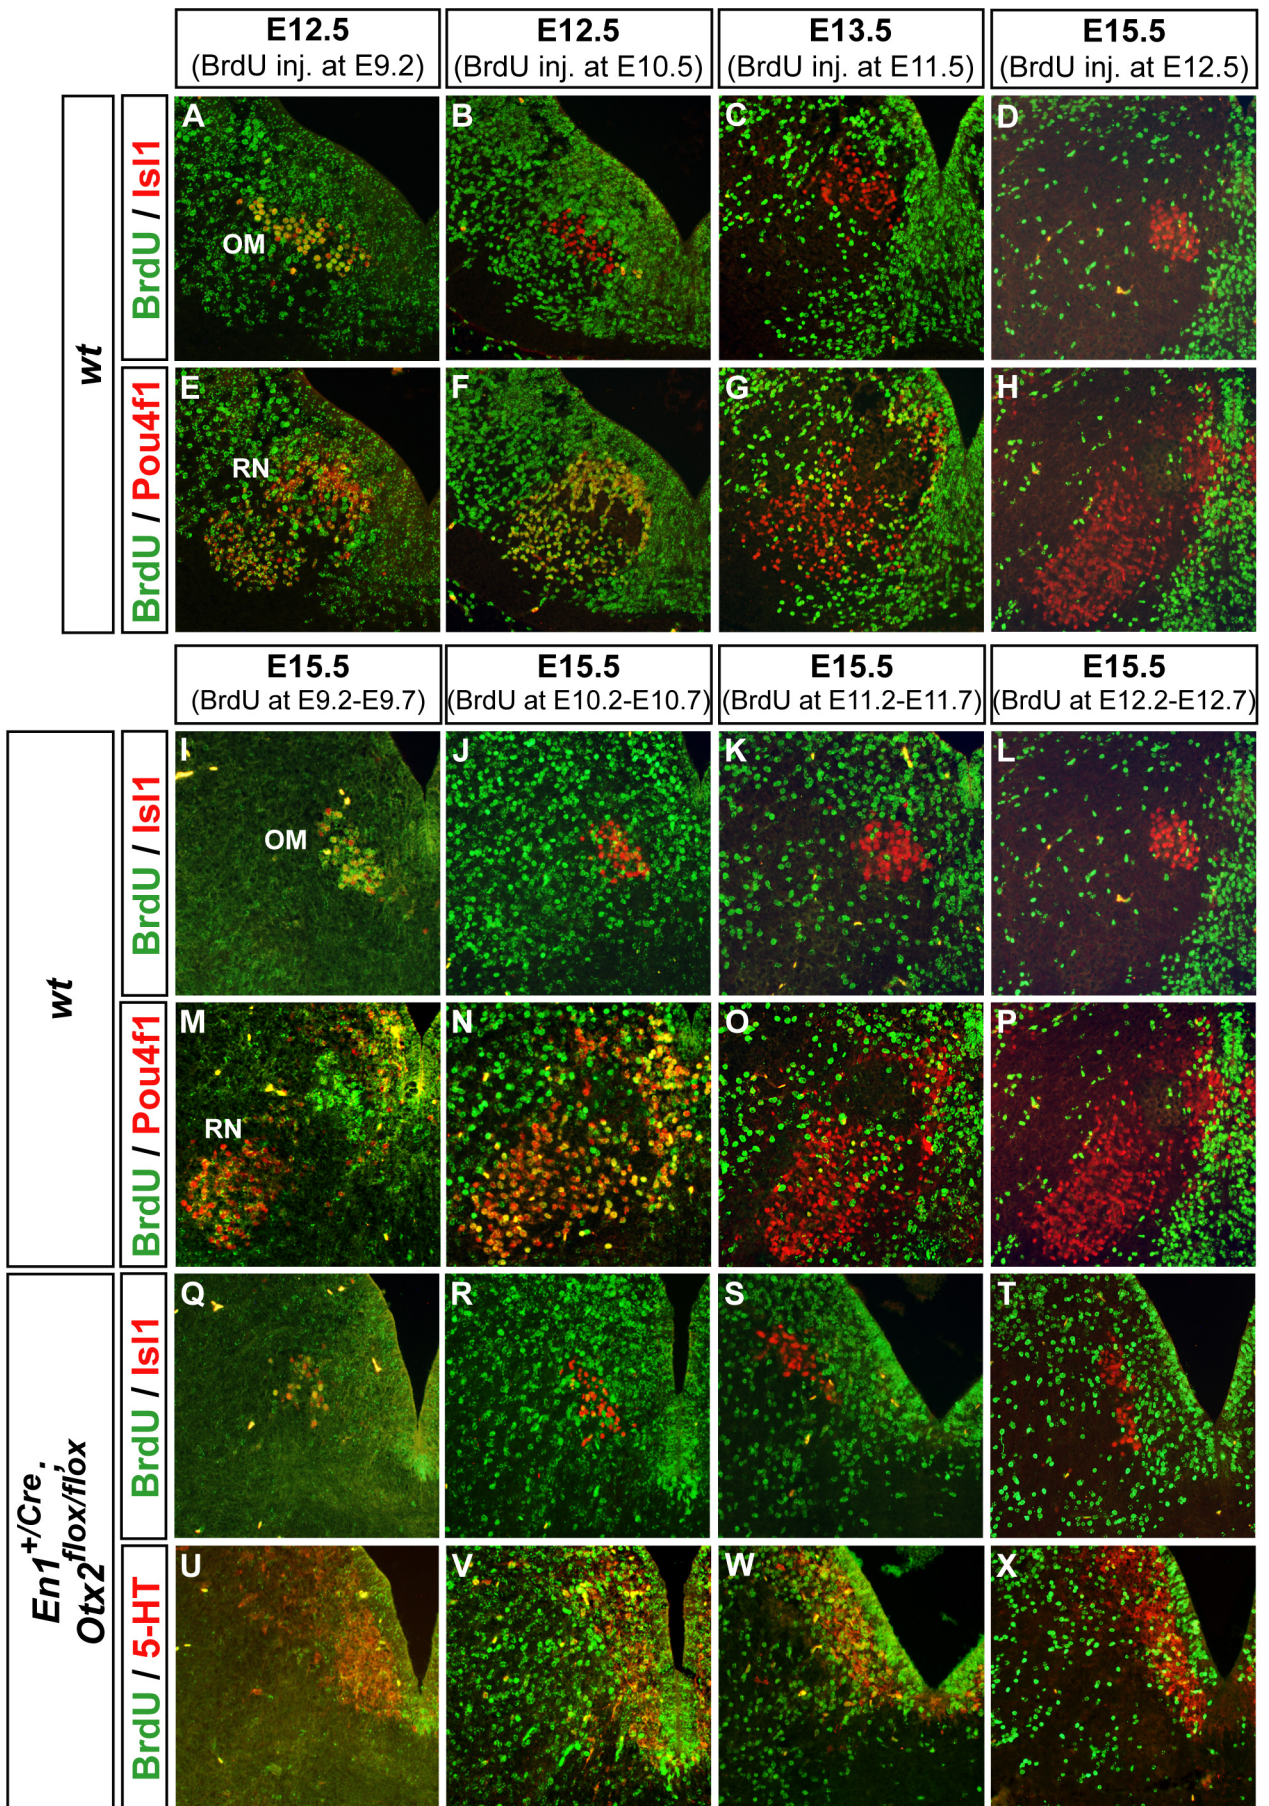

Supplement: supp_136_15_2545__1.pdf [file supp_136_15_2545__1.pdf]
